# Supplementary material
Source: PubMed Central journal article supplement (PMC6363910)
Supplement: NIHMS1502979-supplement-1.pdf [file NIHMS1502979-supplement-1.pdf]

**Supplemental Figure 2. American College of Physicians Treatment Grading Guidelines <sup>1</sup>**

| <b>Treatment Grade</b> | <b>Strength of Evidence</b>                                                                                                                                                                       |
|------------------------|---------------------------------------------------------------------------------------------------------------------------------------------------------------------------------------------------|
| <b>Grade 1</b>         | Well-designed randomized, controlled trial (RCT) that yield consistent and directly applicable results. Further research is unlikely to change the level of confidence in the estimate of effect. |
| <b>Grade 2</b>         | Well-designed controlled trial without randomization, well-designed cohort or case-control analytic studies and multiple time series with or without intervention.                                |
| <b>Grade 3</b>         | Includes observational studies with the risk for bias                                                                                                                                             |
| <b>Grade 4</b>         | Studies with insufficient evidence to determine the net benefits or risks.                                                                                                                        |

1. Qaseem A, Snow V, Owens DK, Shekelle P. The development of clinical practice guidelines and guidance statements of the American College of Physicians: summary of methods. *Ann Intern Med.* 2010;153(3):194-199. doi:10.7326/0003-4819-153-3-201008030-00010.
